# Supplementary material for: Effect of Dietary Supplementation with Omega-3 Fatty Acid on the Generation of Regulatory T Lymphocytes and on Antioxidant Parameters and Markers of Oxidative Stress in the Liver Tissue of IL−10 Knockout Mice
Source: MDPI journal article supplement (doi:10.3390/nu16050634), 2024-02-24
Supplement: s1 [file s1]

**Supplementary figure S1.** Analysis strategy for obtaining regulatory T cells. Cells from the lymph node of animals *IL-10*<sup>-/-</sup> +O3; *IL-10*<sup>-/-</sup>; WT+O3 and WT.

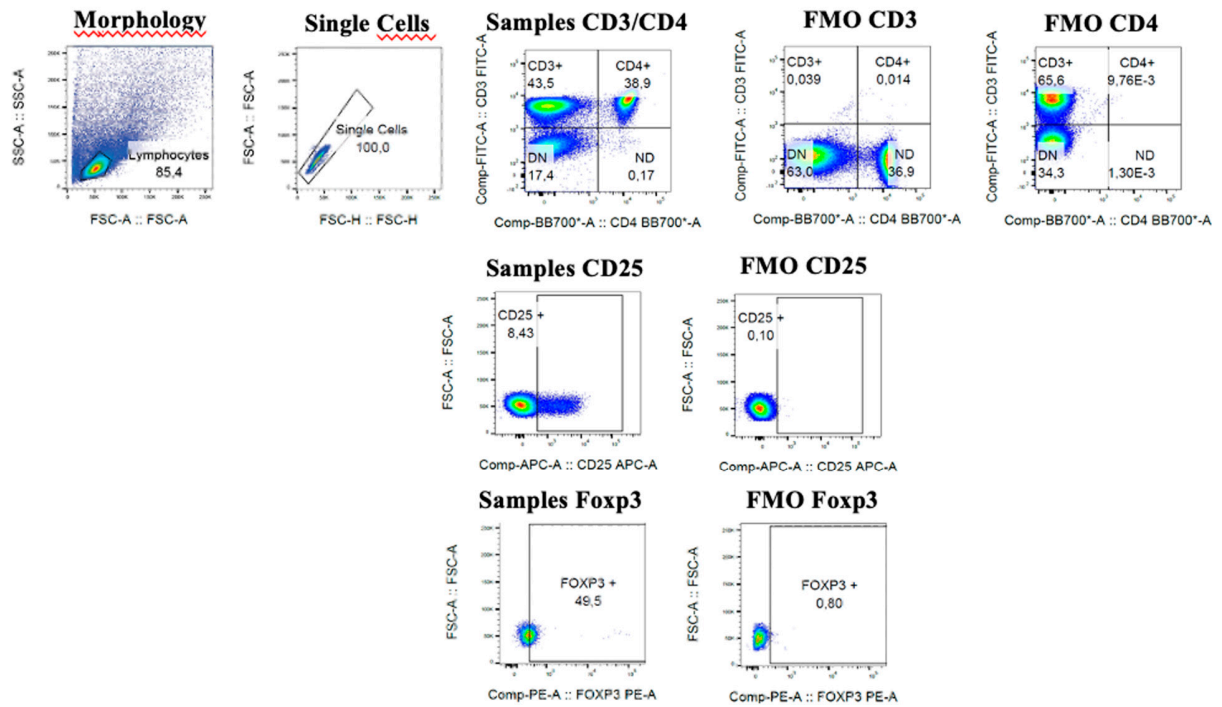

**Supplementary figure S2. Assessment of IL-6 production in mesenteric lymph node culture supernatant after 48 hours of culture with addition of ConA. Groups *IL-10<sup>-/-</sup> +O3*; *IL-10<sup>-/-</sup>*; *WT+O3* e *WT*.**

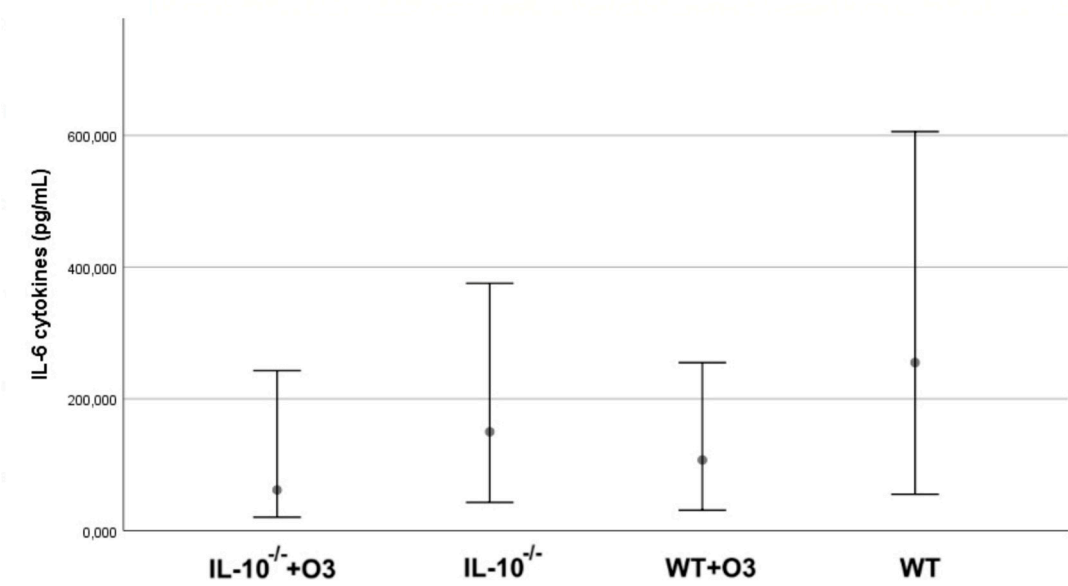

**Supplementary Table S1. Median IL-6 production in mesenteric lymph node culture supernatant after 48 hours of culture with addition of ConA**

| Variables | IL-10 <sup>-/-</sup> +O3 |              | IL-10 <sup>-/-</sup> |              | WT+O3  |              | WT     |              | Kruskal-Wallis p-value |
|-----------|--------------------------|--------------|----------------------|--------------|--------|--------------|--------|--------------|------------------------|
|           | Median                   | IQR          | Median               | IQR          | Median | IQR          | Median | IQR          |                        |
| IL-6      | 61.76                    | 41.40-177.63 | 150.13               | 73.76-273.31 | 107.22 | 34.88-224.54 | 255.17 | 65.44-496.16 | 0.162                  |

Note: IQR means interquartile range. \*Means statistical significance (*p*<0.05). The Bonferroni post test is not applicable when the Kruskal-Wallis p-value is >0.05.

**Supplementary Table S2.** Muscle weight between groups *IL-10<sup>-/-</sup> +O3*; *IL-10<sup>-/-</sup>*; *WT+O3* e *WT*

| Variables       | IL-10 <sup>-/-</sup> +O3 |             | IL-10  |             | WT+O3  |             | WT     |             |
|-----------------|--------------------------|-------------|--------|-------------|--------|-------------|--------|-------------|
|                 | Median                   | IQR         | Median | IQR         | Median | IQR         | Median | IQR         |
| Weight gastro   | 0.14                     | 0.13 - 0.14 | 0.13   | 0.10 - 0.15 | 0.12   | 0.11 - 0.14 | 0.11   | 0.10 - 0.12 |
| Weight tibialis | 0.04                     | -           | 0.04   | 0.03 - 0.04 | 0.04   | -           | 0.04   | -           |
| Weight edl      | 0.01                     | -           | 0.01   | -           | 0.01   | -           | 0.01   | -           |
| Weight soleus   | 0.01                     | -           | 0.01   | -           | 0.01   | -           | 0.01   | -           |

Note: IQR means interquartile range. The empty IQR cells means absence of data variation.

**Supplementary Table S3.** Muscle GPx function between groups *IL-10<sup>-/-</sup> +O3*; *IL-10<sup>-/-</sup>*; *WT+O3* e *WT*

| Variables  | IL-10 <sup>-/-</sup> +O3 |               | IL-10  |               | WT+O3  |               | WT     |               | Kruskal-Wallis<br>p-value |
|------------|--------------------------|---------------|--------|---------------|--------|---------------|--------|---------------|---------------------------|
|            | Median                   | IQR           | Median | IQR           | Median | IQR           | Median | IQR           |                           |
| GPx muscle | 158.1                    | 140.1 - 161.7 | 148.4  | 132.5 - 157.3 | 150.3  | 135.3 – 190.4 | 149.9  | 139.1 - 180.7 | 0.726                     |

Note: IQR means interquartile range.
